# Supplementary material
Source: PubMed Central journal article supplement (PMC7137768)

## **Supporting data**

**Supplemental Figure 1.** Generation of deletion strains (*anxC1Δ*) by double-joint PCR.

A) Schematic of deletion cassette; B) Schematic of screening PCR performed; C) PCR and D) Southern blot after digestion with BamHI enzymes for monitoring single insertion of NAT cassette. WT represents wild-type parental H99, B represents water blank.

**Supplemental Figure 2.** AnnexinC1 deletion mutants susceptibility to calcineurin inhibitors, high temperature or CFW-cell wall stress. Strain KN99 and deletion mutant were obtained from the 2015-2016 *Cryptococcus neoformans* mutant library (Fungal Genetic Stock Center, 2016 FGSC) and strain H99 and respective deletion mutant were obtained from the 2008 library generated in an H99 background (2008 FGSC) (34). Shown is one representative experiment.

**Supplemental Figure 3. AnnexinC1 deletion does not affect resistance to antifungal drugs.**

Fungal growth measured by broth microdilution in presence of amphotericin B (top) and fluconazole (bottom). Two independent transformations were performed and indicated by Round #. Experiments were performed three times and shown is one representative experiment.

# Supplemental Figure 1

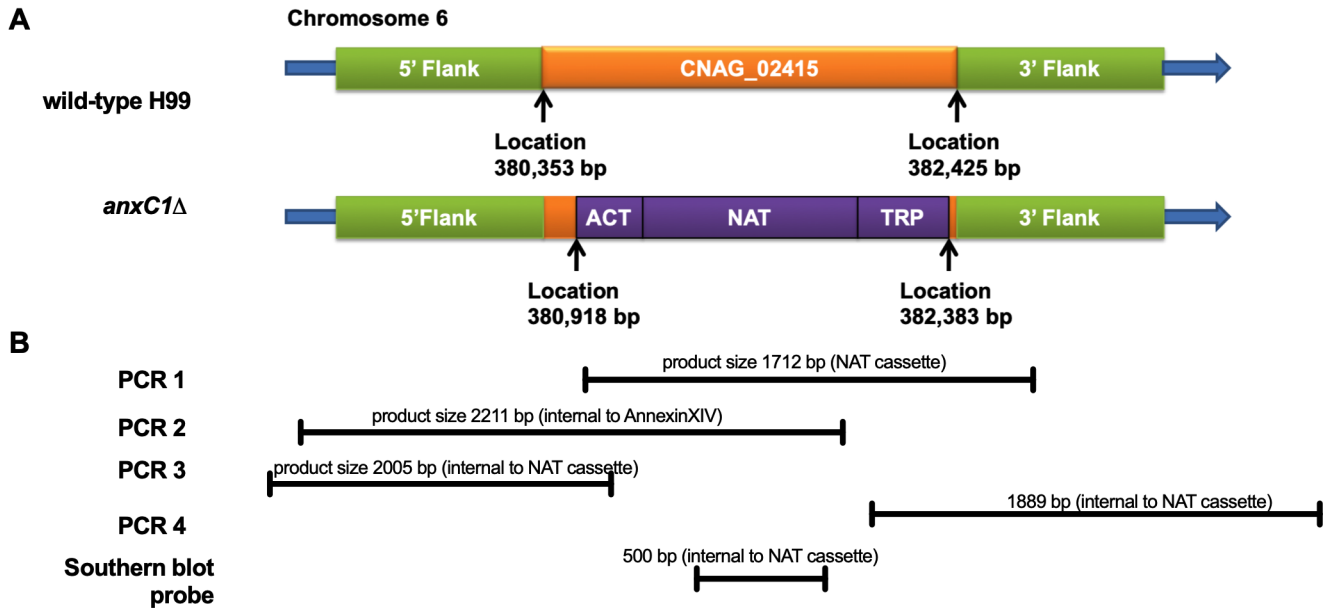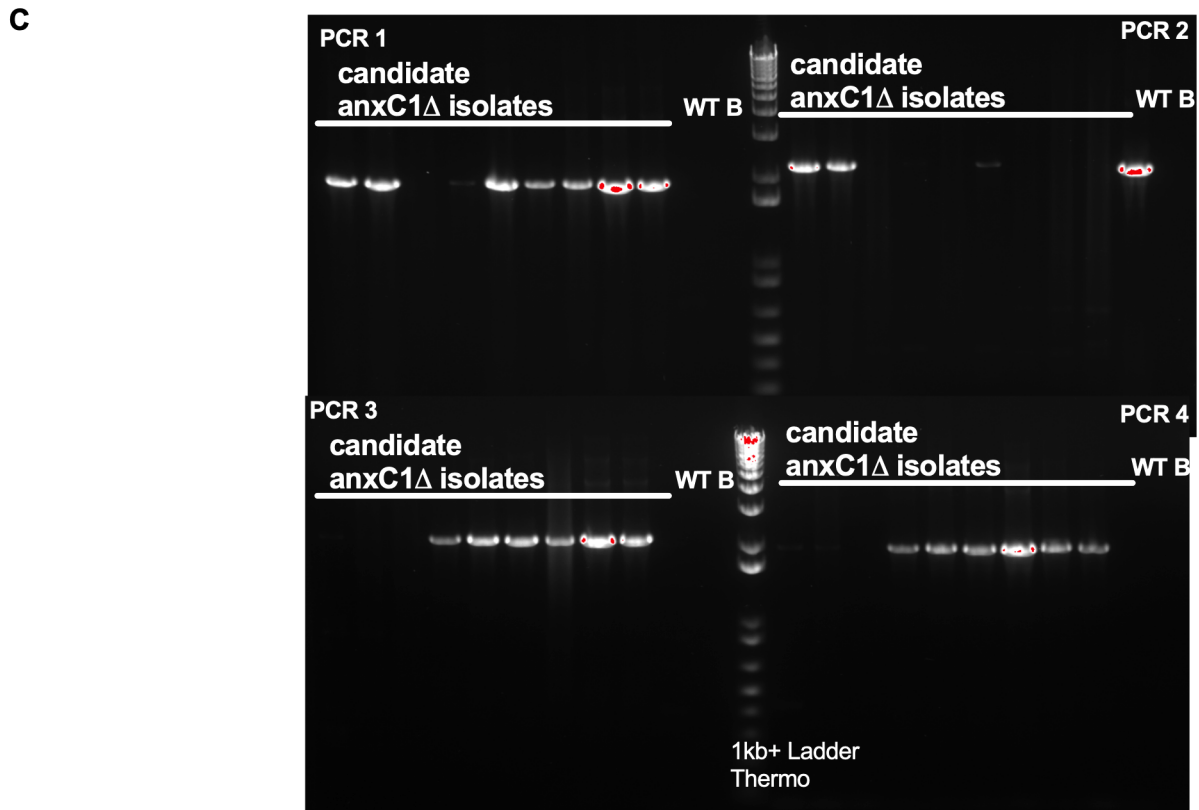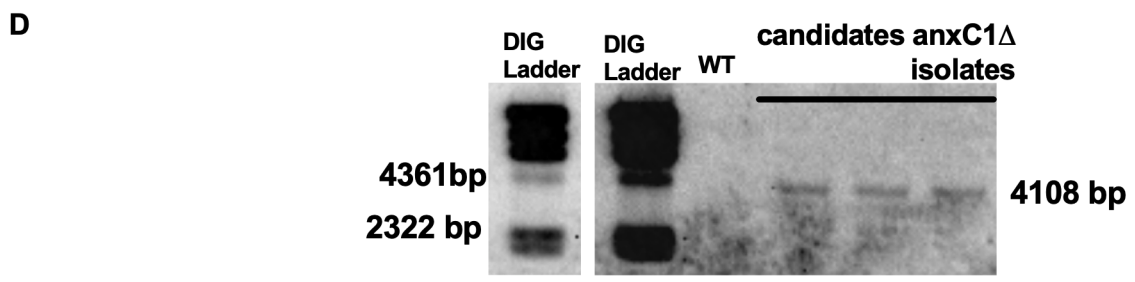

Supplemental Figure 2

A

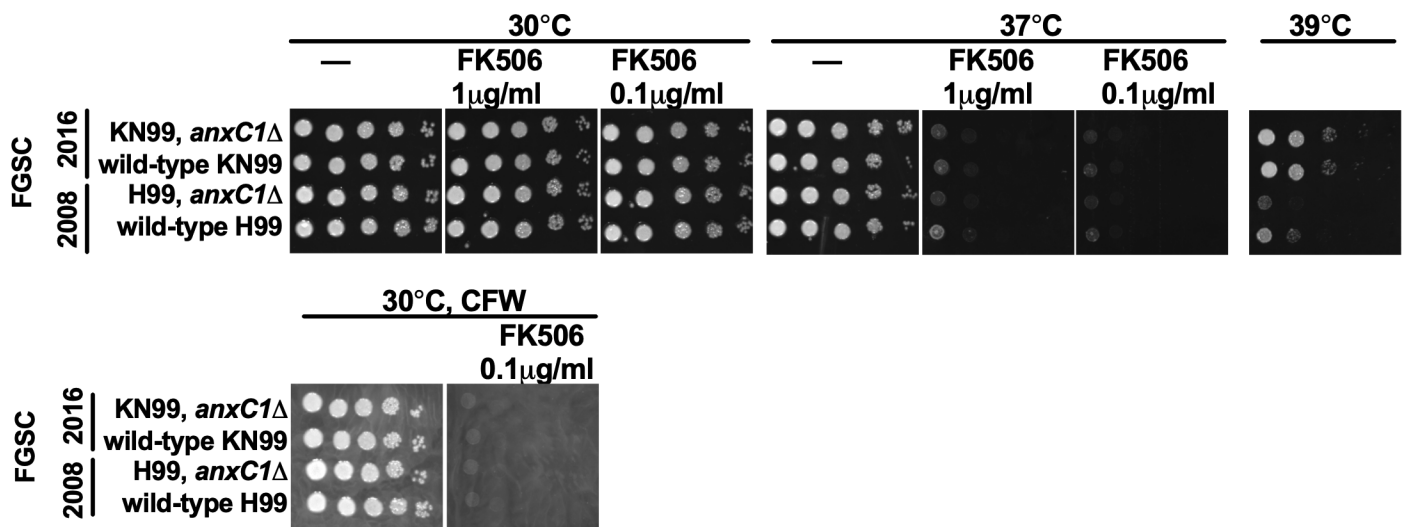

### Supplemental Figure 3

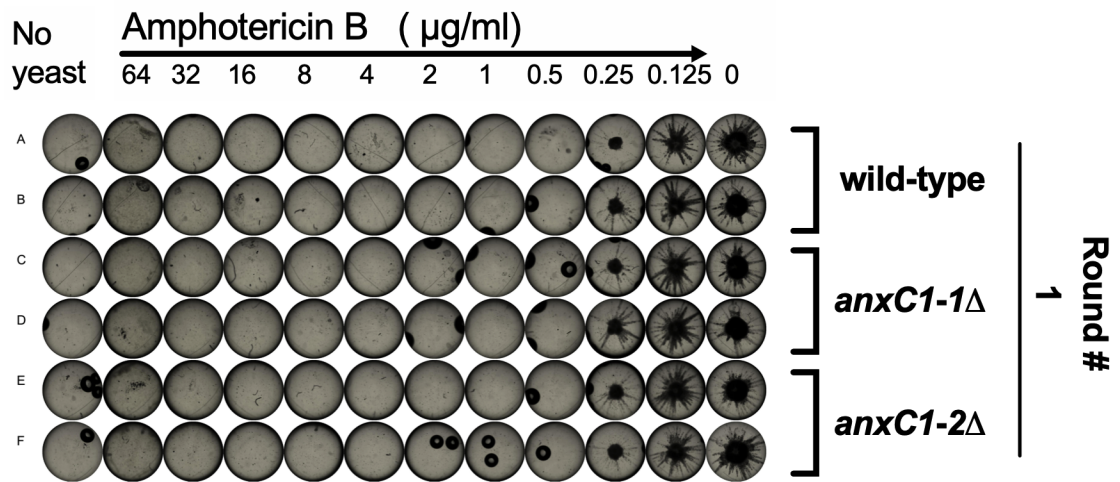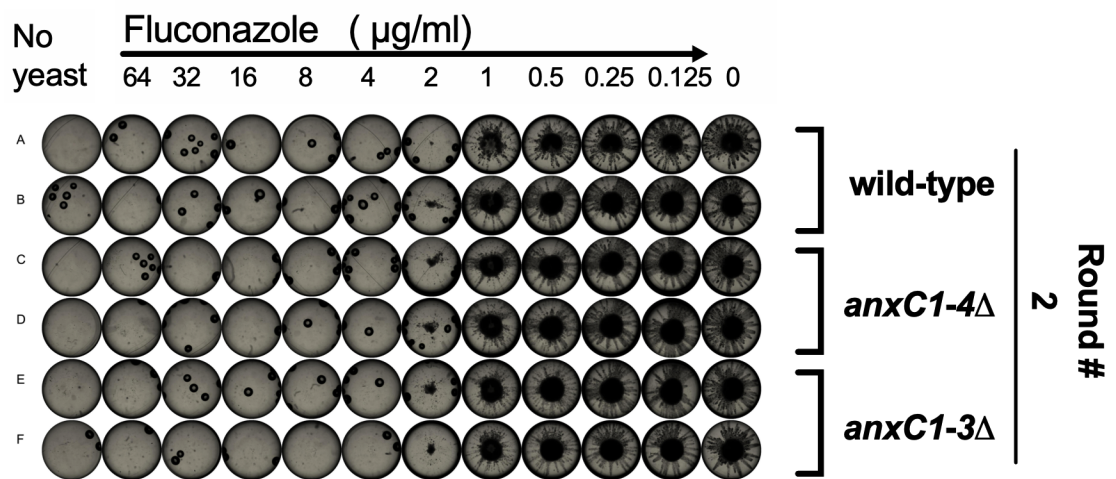

Supplement: mic-165-852-s001.pdf [file mic-165-852-s001.pdf]
